# Supplementary material
Source: Springer Nature journal article supplement (https://www.springermedizin.de/resource/supplementary/12889_2011_3849_MOESM1_ESM.pdf/9490848)
Supplement: MOESM1 [file 9490848]

## Sampling Frame

1

- National level : The survey meant to cover the whole country.

2

- Five Provinces (Eastern, Northern, Southern, Western and the City of Kigali)

3

- The data collection was carried out in 29 districts.

4

- Systematic probability proportional to size sampling method to select the Primary Sampling Unit ( Villages) based on the size of each district.
- In total, 279 Villages were selected and visited.

5

- The selection of the households used a probability proportional to the size of the village, based on the existing list of households used during the malaria surveys in Rwanda.

6

- From each household selected, all eligible male household members and those who spent the night before age 15 - 59 years were interviewed after giving their consent
- A total of 1098 participants completed the interviews.
